# Supplementary material for: Comparative analysis of SV40 17kT and LT function in vivo demonstrates that LT's C-terminus re-programs hepatic gene expression and is necessary for tumorigenesis in the liver
Source: PubMed Central journal article supplement — Oncogenesis. 2012 Sep 10;1(9):e28–. doi: 10.1038/oncsis.2012.27 (PMC3503294; doi:10.1038/oncsis.2012.27), 2012-09-10
Supplement: oncsis201227x1.pdf [file oncsis201227x1.pdf]

**Supplementary Figure S1.** Schematic of transgenes used to generate ApoE-rtTA<sub>M2</sub>:TRE2-TAg transgenic mice

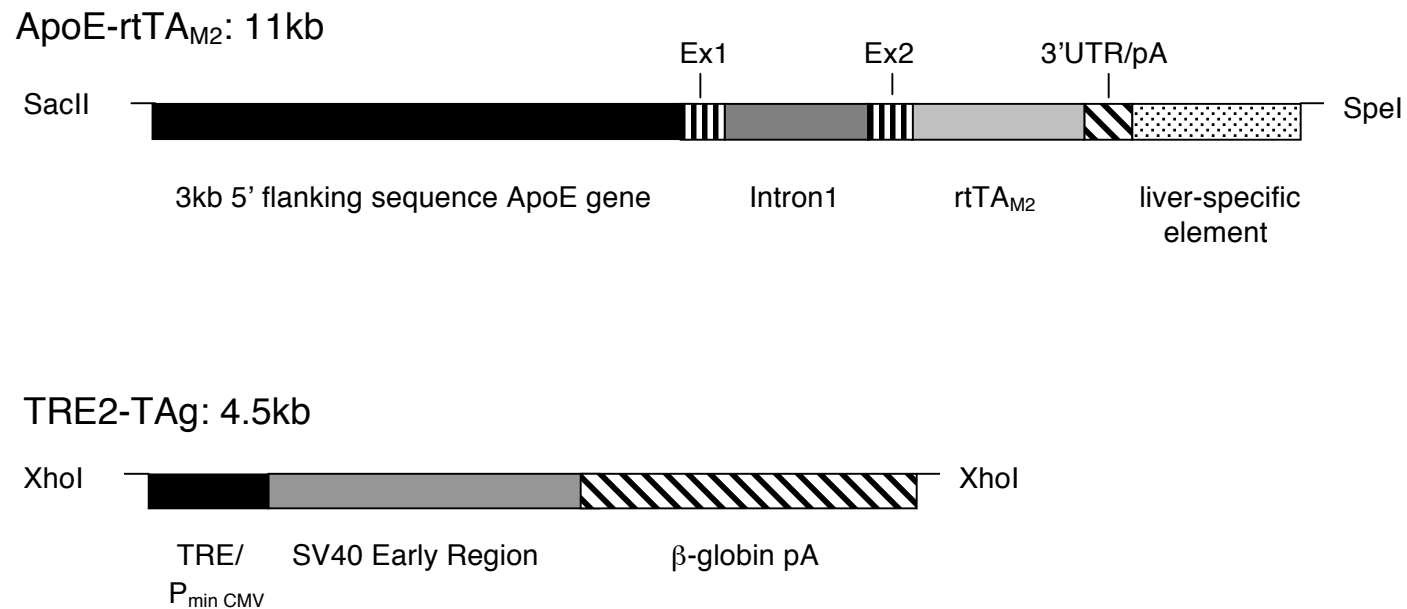

**Figure S1.** ApoE-rtTA<sub>M2</sub> and TRE2-TAg transgenes used to generate both lines of ApoE-rtTA<sub>M2</sub>:TRE2-TAg transgenic mice. Detailed description of transgene construction is described in Materials and Methods. Restriction enzymes used to isolate each transgene prior to microinjection are shown.
