# Supplementary material for: Comparative analysis of SV40 17kT and LT function in vivo demonstrates that LT's C-terminus re-programs hepatic gene expression and is necessary for tumorigenesis in the liver
Source: PubMed Central journal article supplement — Oncogenesis. 2012 Sep 10;1(9):e28–. doi: 10.1038/oncsis.2012.27 (PMC3503294; doi:10.1038/oncsis.2012.27), 2012-09-10

**Supplementary Figure S2.** Scheme of PCR-based strategy for mapping and sequencing of spliced early viral transcripts in livers of SV40 transgenic mice (modified from Zerrahn et al., 1993). Oligonucleotide sequences can be found in Supplementary Table S2.

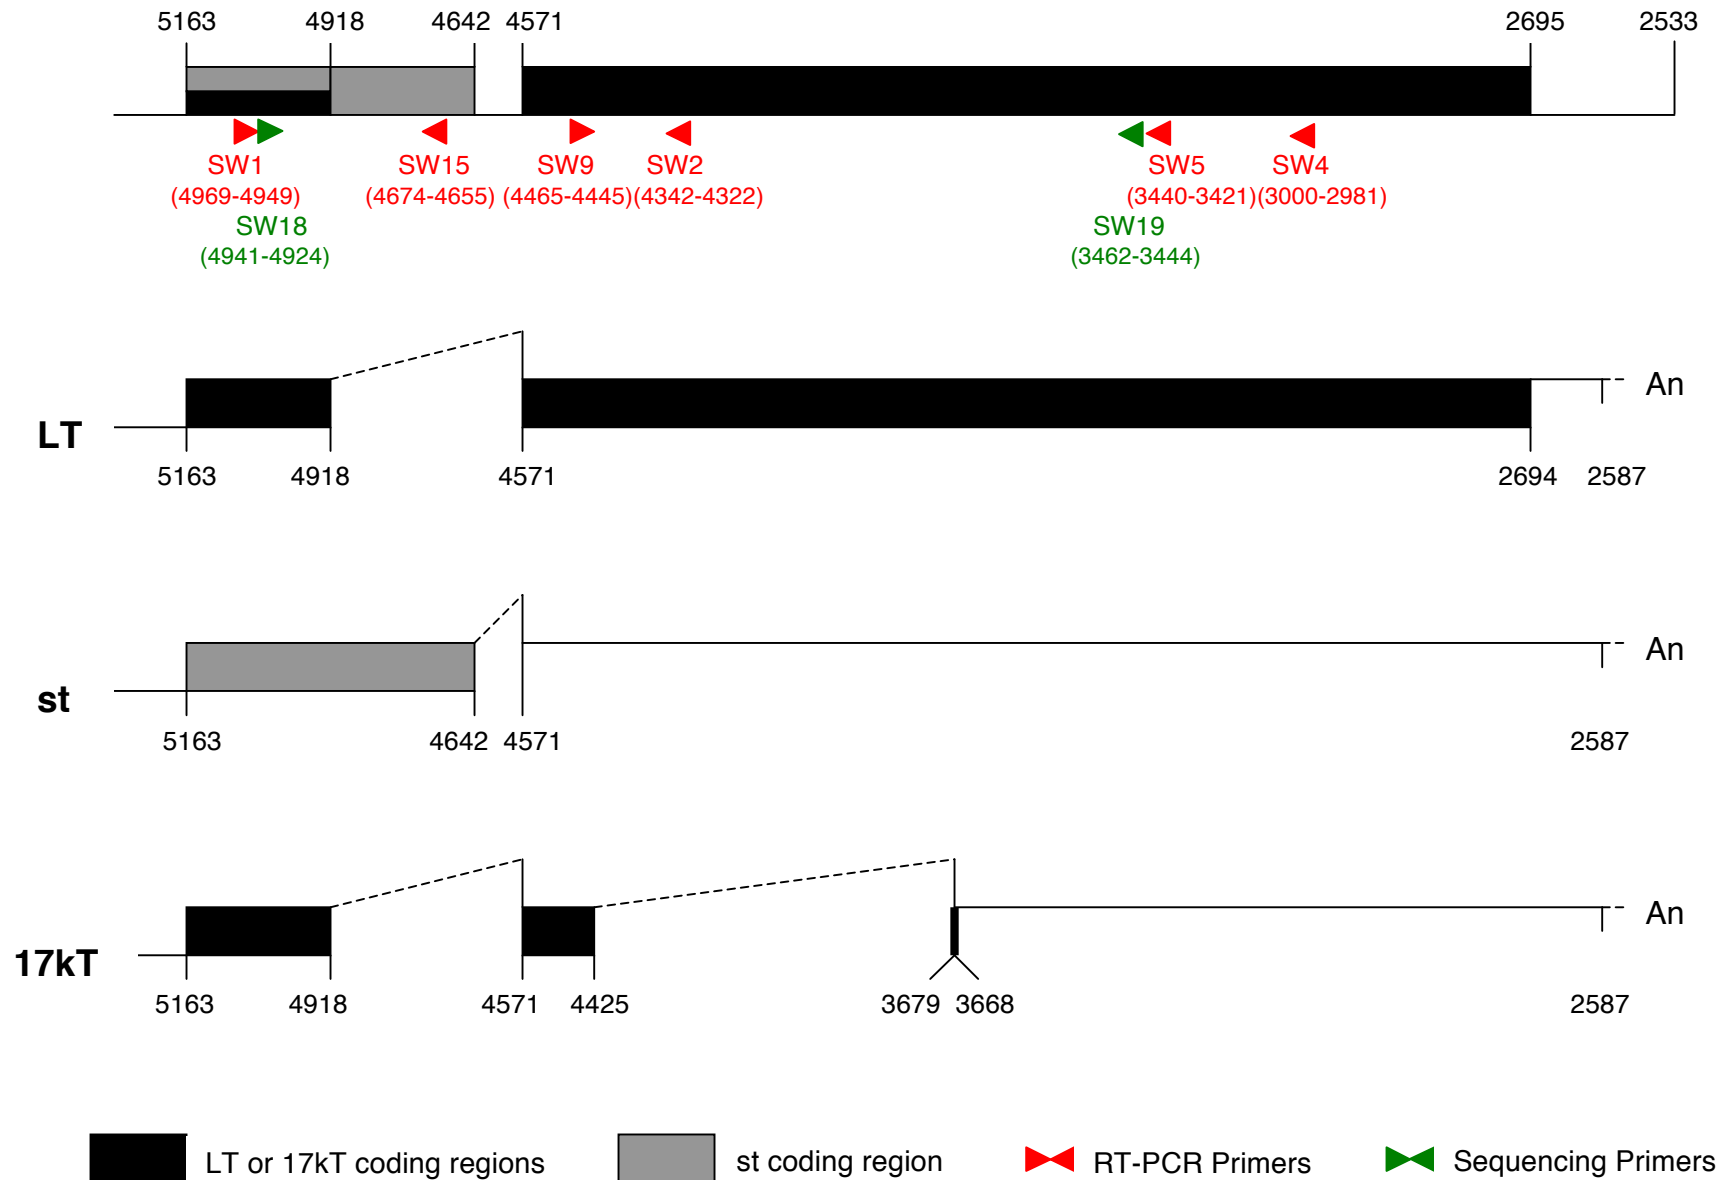

Supplement: oncsis201227x2.pdf [file oncsis201227x2.pdf]
