# Supplementary material for: Comparative analysis of SV40 17kT and LT function in vivo demonstrates that LT's C-terminus re-programs hepatic gene expression and is necessary for tumorigenesis in the liver
Source: PubMed Central journal article supplement — Oncogenesis. 2012 Sep 10;1(9):e28–. doi: 10.1038/oncsis.2012.27 (PMC3503294; doi:10.1038/oncsis.2012.27), 2012-09-10
Supplement: oncsis201227x3.pdf [file oncsis201227x3.pdf]

## Supplementary Figure S3

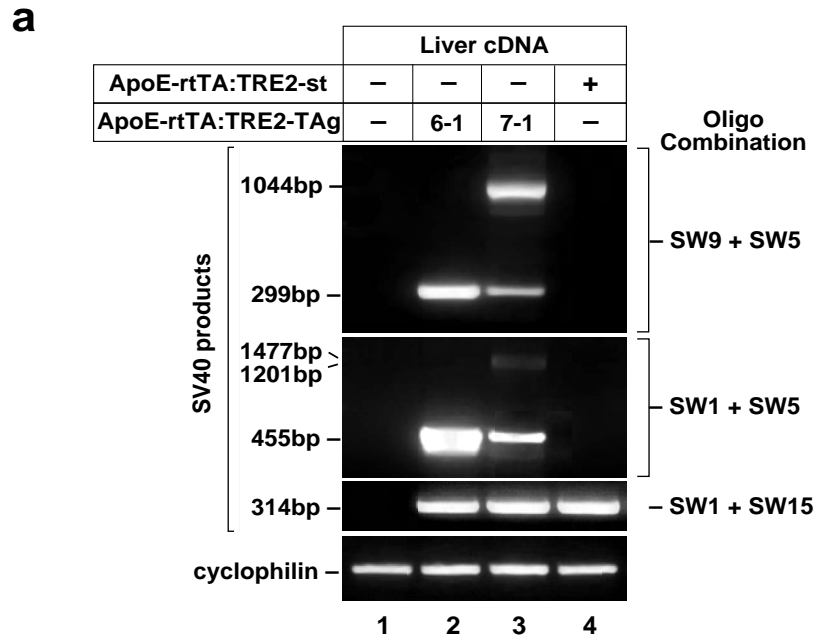

**b**

```

4436                               4425   3679
|                                     |       |
CCA AAA AAG AAG AGA AAG.....GCT CTG CTG ACA TAG
P   K  K  K  R  K  .....  A  L  L  T  Stop

MDKVLNREESLQLMDLLGLERSAWGNIPLMRKAYLKKCKEFHPDKG
GDEEKMKKMNTLYKKMEDGVKYAHQPDFGGFWDATTEIPTYGTDEW
EQWWNAFNEENLFCSEEMPSSDDEATADSQHSTPPKKKRKALLT

```

**Figure S3. (a)** RT-PCR analysis of viral transcripts expressed in livers of ApoE-rtTA:TRE2-TAg 6-1 and 7-1 mice (lanes 2 and 3) and ApoE-rtTA:TRE2-st transgenic mice (lane 4). **(b)** Nucleotide sequence spanning the second 17kT intron of the transcript expressed in livers of 6-1 transgenic mice and corresponding 17kT protein sequence. See Supplementary Results for explanation of figure.
