# Supplementary material for: Comparative analysis of SV40 17kT and LT function in vivo demonstrates that LT's C-terminus re-programs hepatic gene expression and is necessary for tumorigenesis in the liver
Source: PubMed Central journal article supplement — Oncogenesis. 2012 Sep 10;1(9):e28–. doi: 10.1038/oncsis.2012.27 (PMC3503294; doi:10.1038/oncsis.2012.27), 2012-09-10
Supplement: oncsis201227x4.pdf [file oncsis201227x4.pdf]

## Supplementary Figure S4

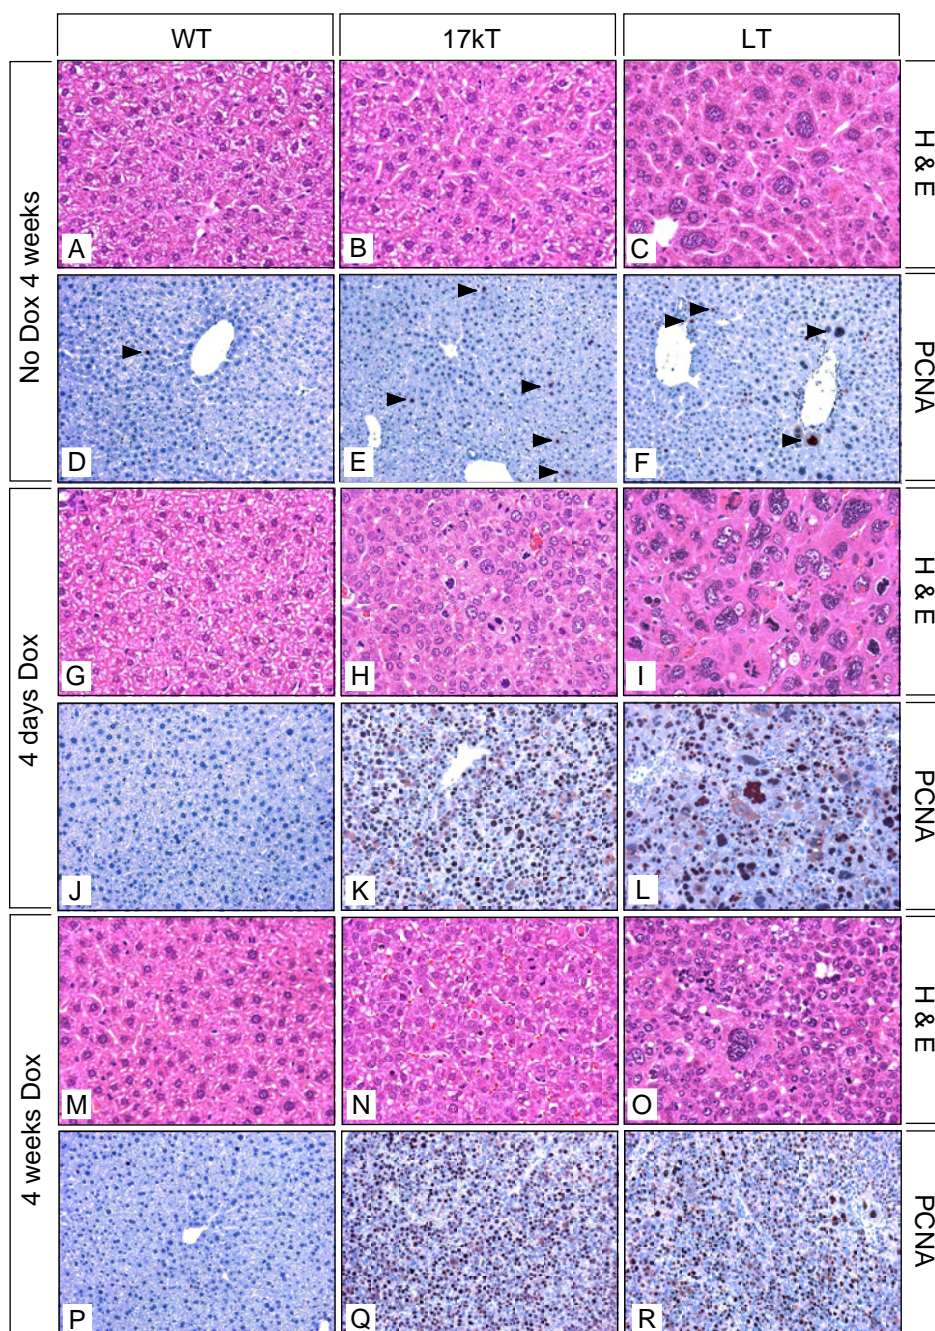

**Figure S4.** Histopathology and IHC analysis for PCNA in livers of WT and ApoE-rtTA:TRE2-TAG transgenic mice provided with regular drinking water (A-F) or water supplemented with dox for 4 days (G-L) or 4 weeks (M-R). Note enlarged hepatocyte nuclei in LT livers in the absence of dox (C), as well as aberrant nuclear shape and multinucleated hepatocytes after 4 days on dox (I). Arrowheads denote rare PCNA-positive hepatocytes (AEC chromagen, red/brown) in WT (D), 17kT (E) and LT (F) livers in the absence of dox. Hematoxylin counterstain (blue). H&E, magnification x 224 to highlight nuclear morphology; PCNA, magnification x 112 to highlight overall proliferation rates.
