# Supplementary material for: Comparative analysis of SV40 17kT and LT function in vivo demonstrates that LT's C-terminus re-programs hepatic gene expression and is necessary for tumorigenesis in the liver
Source: PubMed Central journal article supplement — Oncogenesis. 2012 Sep 10;1(9):e28–. doi: 10.1038/oncsis.2012.27 (PMC3503294; doi:10.1038/oncsis.2012.27), 2012-09-10
Supplement: oncsis201227x5.pdf [file oncsis201227x5.pdf]

## Supplementary Figure S5

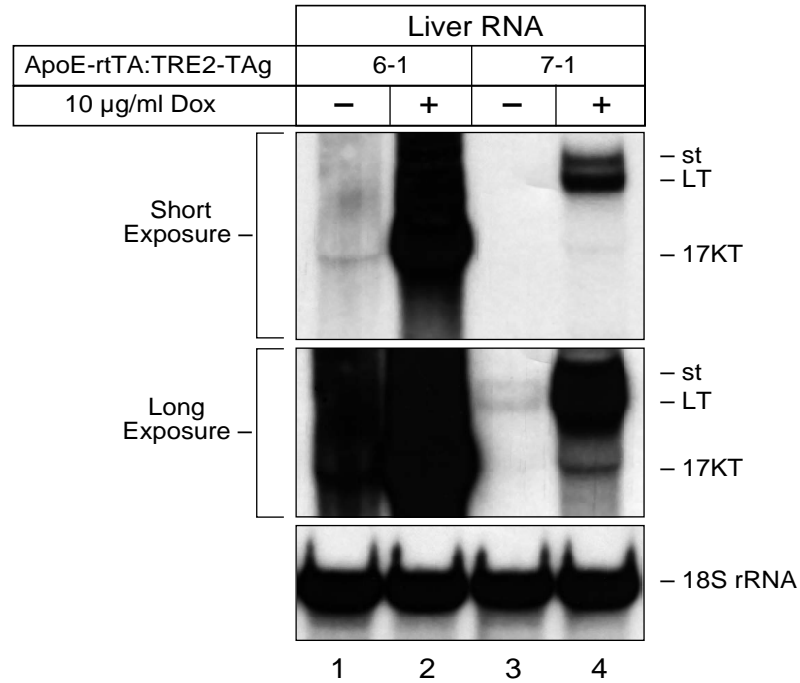

**Figure S5.** Northern blot analysis of total liver RNA isolated from transgenic mice provided with regular or dox-supplemented drinking water showing that viral oncoprotein expression is not completely shut off in the absence of dox. Blots were probed with a probe comprising the entire 2.7kb SV40 early region, followed by stripping and re-probing with an 18S rRNA-specific probe.
