# Supplementary material for: Comparative analysis of SV40 17kT and LT function in vivo demonstrates that LT's C-terminus re-programs hepatic gene expression and is necessary for tumorigenesis in the liver
Source: PubMed Central journal article supplement — Oncogenesis. 2012 Sep 10;1(9):e28–. doi: 10.1038/oncsis.2012.27 (PMC3503294; doi:10.1038/oncsis.2012.27), 2012-09-10
Supplement: oncsis201227x6.pdf [file oncsis201227x6.pdf]

## Supplementary Figure S6

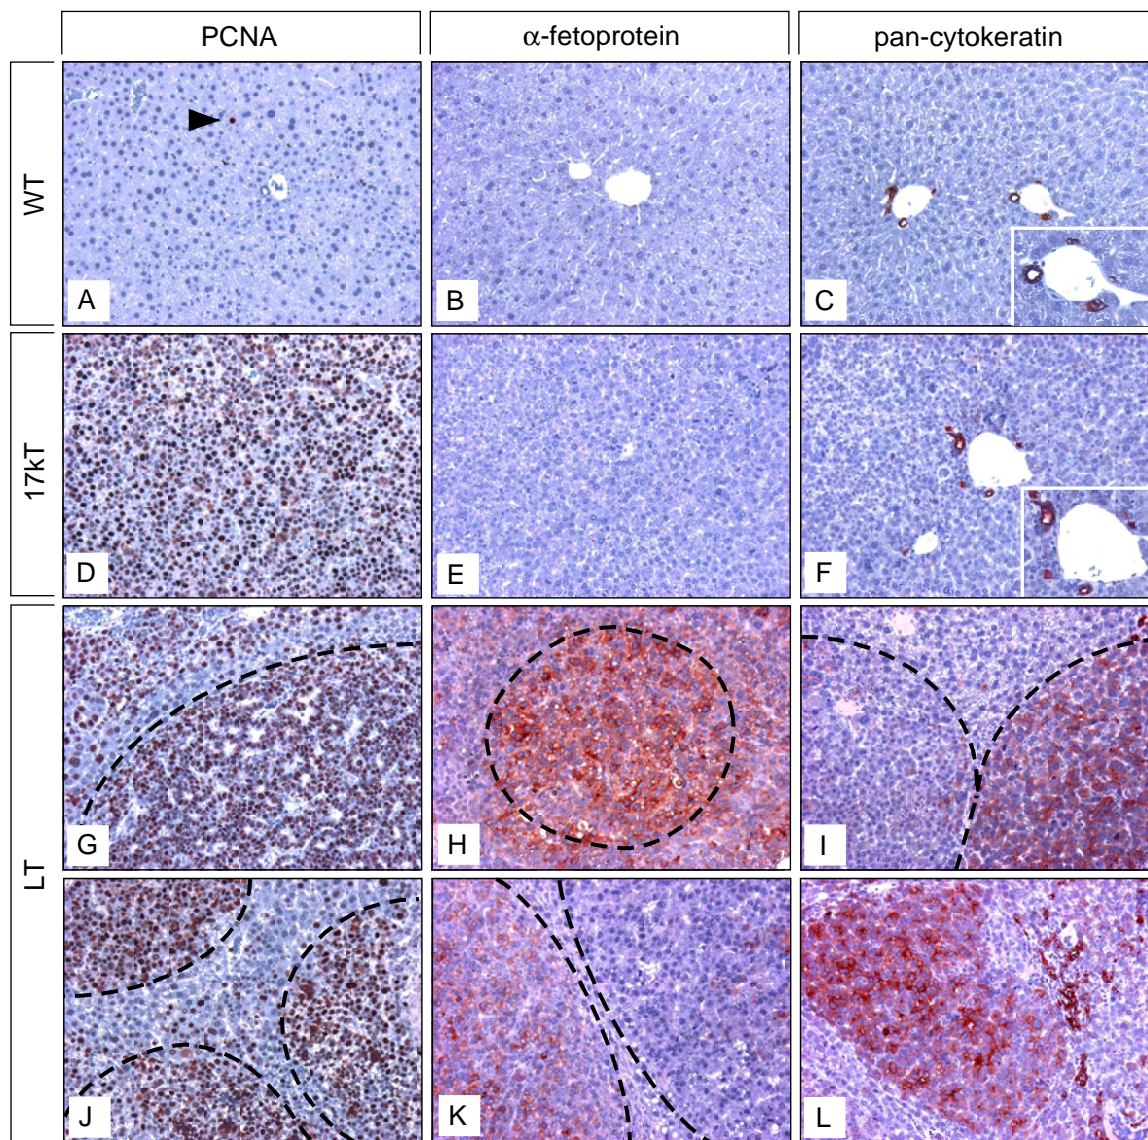

**Figure S6.** IHC analysis of liver sections from WT, 17kT and LT mice provided with 25 $\mu$ g/ml dox for 5.5 weeks for PCNA (A, D, G, J),  $\alpha$ -fetoprotein (afp) (B, E, H, K) and pan-cytokeratin (CK) (C, F, I, L) showing evidence of altered hepatic differentiation during LT-induced tumorigenesis. PCNA-positive hepatocytes are uniformly distributed in hyperplastic 17kT livers (D), in contrast to the concentration of PCNA-positive hepatocytes in nodules of livers expressing LT (G, J). afp-positive hepatocytes are absent from WT (B) and 17kT (E) hepatocytes, while CK expression is confined to the bile duct epithelium in both (C and F) (Insets). Also note strong but variable afp staining within (H) and between tumors (K) and regional CK staining in nodular hepatocytes and hyperproliferating BECs in LT-expressing livers (I, L). Dotted lines denote nodule boundaries. Arrowhead indicates solitary PCNA-positive hepatocyte in WT liver panel (A). AEC chromagen (Red/brown); hematoxylin counterstain (Blue). Magnification x 112; insets x 224.
