# Supplementary material for: Comparative analysis of SV40 17kT and LT function in vivo demonstrates that LT's C-terminus re-programs hepatic gene expression and is necessary for tumorigenesis in the liver
Source: PubMed Central journal article supplement — Oncogenesis. 2012 Sep 10;1(9):e28–. doi: 10.1038/oncsis.2012.27 (PMC3503294; doi:10.1038/oncsis.2012.27), 2012-09-10
Supplement: oncsis201227x9.pdf [file oncsis201227x9.pdf]

**Supplementary Table S1: Oligonucleotide sequences and conditions for PCR-genotyping of mice**

| Allele                  | Forward Oligo                              | Reverse Oligo                               | Amplicon Size(s) (bp)   |
|-------------------------|--------------------------------------------|---------------------------------------------|-------------------------|
| ApoE-rtTA               | 5' TCA TAC CCA CTT CTG CCC CCT GGA 3'      | 5' GTT CCT CCA ATA CGC AGC CCA GTG 3'       | ~250                    |
| TRE2-TAg                | 5' AGT AAA ATA TGC TCA TCA ACC 3' (SW1)    | 5' CCT TTG TGG TGT AAA TAG CAA 3' (SW2)     | 647                     |
| Alb-Cre                 | 5' GCT GCC ACG ACC AAG TGA CAG CAA TG 3'   | 5' GTA GTT ATT CGG ATC ATC AGC CAC AC 3'    | 402                     |
| PTEN <sup>lox/lox</sup> | 5' ACT CAA GGC AGG GAT GAG C 3' (IMR 1952) | 5' GCC CCG ATG CAA TAA ATA TG 3' (IMR 2027) | ~900 (wt); ~1200 (loxP) |

| Allele                  | PCR Conditions                                                                                                                                   |
|-------------------------|--------------------------------------------------------------------------------------------------------------------------------------------------|
| ApoE-rtTA               | 95°C 1 min (1 cycle): 95°C 15 sec, 60°C 15 sec, 72°C 1min (25 cycles): 72°C 10 min (1 cycle): 4°C hold                                           |
| TRE2-TAg                | 95°C 3 min, 50°C 10 min (1 cycle): 95°C 1 min, 50°C 2 min, 72°C 3 min (25 cycles): 95°C 1 min, 50°C 2 min, 72°C 10 min (1 cycle): 4°C hold       |
| Alb-Cre                 | 95°C 2 min: 58°C 2 min, 72°C 3 min (1 cycle): 95°C 1min, 58°C 30 sec, 72°C 2 min (25 cycles): 72°C 10 min (1 cycle): 4°C hold                    |
| PTEN <sup>lox/lox</sup> | 95°C 3 min, 60°C 10 mins (1 cycle): 95°C 1 min, 60°C 2 mins, 72°C 3 mins ( 35 cycles): 95°C 1 min; 60°C 2 mins, 72°C 10 mins (1 cycle): 4°C hold |
