# Supplementary material for: Comparative analysis of SV40 17kT and LT function in vivo demonstrates that LT's C-terminus re-programs hepatic gene expression and is necessary for tumorigenesis in the liver
Source: PubMed Central journal article supplement — Oncogenesis. 2012 Sep 10;1(9):e28–. doi: 10.1038/oncsis.2012.27 (PMC3503294; doi:10.1038/oncsis.2012.27), 2012-09-10
Supplement: oncsis201227x10.pdf [file oncsis201227x10.pdf]

**Supplementary Table S2: SV40-specific primers used for RT-PCR analysis and sequencing of viral transcripts**

| <b>Primer</b> | <b>Forward/Reverse</b> | <b>Sequence</b>                   | <b>SV40 Nucleotides<sup>1</sup></b> |
|---------------|------------------------|-----------------------------------|-------------------------------------|
| SW1           | Forward                | 5' AGT AAA ATA TGC TCA TCA ACC 3' | 4969-4949                           |
| SW2           | Reverse                | 5' CCT TTG TGG TGT AAA TAG CAA 3' | 4322-4342                           |
| SW4           | Reverse                | 5' GAT ACA CTG ACA AAC TAA AC 3'  | 2981-3000                           |
| SW5           | Reverse                | 5' TCA ATA GCT ACT CCT AGC TC 3'  | 3421-3440                           |
| SW9           | Forward                | 5' CTG ACT CTC AAC ATT CTA CTC 3' | 4465-4445                           |
| SW15          | Reverse                | 5' CTG TAG GTA GTT TGT CCA AT 3'  | 4674-4655                           |
| SW18          | Forward                | 5' GGA GGC TTC TGG GAT GCA 3'     | 4941-4924                           |
| SW19          | Reverse                | 5' GTT CAG CCT GTC CAA GGG C 3'   | 3444-3462                           |

<sup>1</sup> Nucleotide homology based on Simian Virus 40 strain 776; Accession No. AF 316139
