# Supplementary material for: Comparative analysis of SV40 17kT and LT function in vivo demonstrates that LT's C-terminus re-programs hepatic gene expression and is necessary for tumorigenesis in the liver
Source: PubMed Central journal article supplement — Oncogenesis. 2012 Sep 10;1(9):e28–. doi: 10.1038/oncsis.2012.27 (PMC3503294; doi:10.1038/oncsis.2012.27), 2012-09-10
Supplement: oncsis201227x13.pdf [file oncsis201227x13.pdf]

**Supplementary Table S5: Sequences of primers used for semi-quantitative RT-PCR**

| Gene symbol | Genbank Acc # | Forward Primer                | Reverse Primer                | Amplicon size (bp) | PCR Program <sup>1</sup> | Primer Sequence Source        |
|-------------|---------------|-------------------------------|-------------------------------|--------------------|--------------------------|-------------------------------|
| acot1       | NM_012006     | 5' ATACCCCTGTGACTATCCTGA 3'   | 5' CAAACTCACTACCCAAGTGT 3'    | 426                | 9                        | Primer Bank <sup>2</sup>      |
| ak1         | NM_021515     | 5' GCTGCTGTGTCTAGTGAAC 3'     | 5' CCTCTCCGATCCAGA GCT GA 3'  | 203                | 9                        | Primer Bank <sup>2</sup>      |
| afp         | NM_007423     | 5' CTTCCCTCATCCTCCTGCTAC 3'   | 5' ACAAAGTGGGTAAGGTGATGG 3'   | 145                | 13                       | Primer Bank <sup>2</sup>      |
| amy2        | NM_009669     | 5' TTGCCA AGGAATGTGAGCGAT 3'  | 5' CCAAGGTCTTGATGGGTTATGAA 3' | 104                | 6                        | Primer Bank <sup>2</sup>      |
| ccne1       | NM_007633     | 5' GCAGCGAGCAGGAGACAGA 3'     | 5' ATCCAAGGCATCTTGCAGACC 3'   | 176                | 9                        | NCBI                          |
| cdk8        | NM_153599     | 5' GCACCCAAACGTCATCTCC 3'     | 5' CCATTCCCGAGGTAAGTGA 3'     | 161                | 6                        | Primer Bank <sup>2</sup>      |
| cdkn1a      | NM_007669     | 5' CGAGAACGGTGGAACTTTGAC 3'   | 5' CAGGGCTCAGGTAGACCTTG 3'    | 106                | 13                       | Primer Bank <sup>2</sup>      |
| ckmt1       | AK018487      | 5' ATCTGGGTGAATGAGGAGGAC 3'   | 5' CAGCCTCGTTCCTGGATCAG 3'    | 128                | 83                       | Primer Bank <sup>2</sup>      |
| eda2r       | NM_175540     | 5' ATGAGGCTGAAAAGACAGTGG 3'   | 5' TCCAGGATGGAGTTAAGTGGTT 3'  | 124                | 9                        | Primer Bank <sup>2</sup>      |
| gpc3        | NM_016697     | 5' CAGCCCGGACTCAAATGGG 3'     | 5' CAGCCGTGCTGTTAGTTGGTA 3'   | 126                | 9                        | Primer Bank <sup>2</sup>      |
| h19         | X58196        | 5' GCCTCAATAACTGGAGAATGGAA 3' | 5' CTCATGGGAATGGTGTGTCTG 3'   | 145                | 6                        | Primer Bank <sup>2</sup>      |
| igf2        | NM_010514     | 5' GTGCTGCATCGCTGCTTAC 3'     | 5' ACGTCCCTCTCGGACTTGG 3'     | 222                | 13                       | Primer Bank <sup>2</sup>      |
| mcm7        | NM_008568     | 5' ACCGCGAAGTCAGTACACAA 3'    | 5' GATGGTCTGCTGCTCCATAA 3'    | 207                | 83                       | Thakur et al. <sup>4</sup>    |
| rb1/p107    | NM_011249     | 5' GAAAATTGCTCCTTCGAGTGTCA 3' | 5' GTAACCTTCCGTCCCGTCGTC 3'   | 111                | 6                        | Primer Bank <sup>2</sup>      |
| ppia        | NM_008907     | 5' GAGCTGTTTGCAGACAAAGTTC 3'  | 5' CCCTGGCACATGAATCCTGG 3'    | 125                | 6                        | Primer Bank <sup>2</sup>      |
| psrc1       | BC008994      | 5' AGTGTGCCCTGAAAGATCGG 3'    | 5' GTCTAGGTGTACGCACGCA 3'     | 287                | 9                        | Primer Bank <sup>2</sup>      |
| rex3        | NM_009052     | 5' AGGAGGAAGAGCGGAGCA 3'      | 5' AAGCTGGTAACAGGGAGAGATC 3'  | 589                | 6                        | Braeuning et al. <sup>3</sup> |
| sox4        | NM_009238     | 5' CGGCTGCATCGTTCTCTCC 3'     | 5' GGTAGACGTGCTTCACTTTCTTG 3' | 174                | 6                        | Primer Bank <sup>2</sup>      |
| sulf2       | AK034712      | 5' CTGCCACTATGGCTGCTGTC 3'    | 5' GTTGGGCCGATGTTCTGTG 3'     | 120                | 9                        | Primer Bank <sup>2</sup>      |

<sup>1</sup> PCR Programs and conditions:

Program 6: 95°C 3 min, 50°C 10 min (x1); 95°C 1 min, 50°C 2 min, 72°C 3 min (x35); 95°C 1 min, 50°C 2 min, 72°C 10min (x1), 4°C

Program 9: 95°C 3 min, 54°C 10 min (x1); 95°C 1 min, 54°C 2 min, 72°C 3 min (x35); 95°C 1 min, 54°C 2 min, 72°C 10min (x1), 4°C

Program 13: 95°C 3 min, 56°C 10 min (x1); 95°C 1 min, 56°C 2 min, 72°C 3 min (x35); 95°C 1 min, 56°C 2 min, 72°C 10min (x1), 4°C

Program 83: 95°C 10 min (x1); 95°C 1 min, 57°C 1 min, 72°C 1 min (x35); 72°C 10 min (x1), 4°C

<sup>2</sup> Xiaowei Wang and Brian Seed (2003) A PCR primer bank for quantitative gene expression analysis. *Nucleic Acids Research*.

31(24):e154; pp.1-8.

<sup>3</sup> Braeuning, A., M Jaworski, M. Schwarz and C. Kohle (2006). Rex3 (reduced in expression 3) as a new tumor marker in mouse hepatocarcinogenesis. *Toxicology*. 227:127-135.

<sup>4</sup> Thakur, A., A. Bollig, J. Wu and D. J. Liao (2008) Gene expression profiles in primary pancreatic tumors and metastatic lesions of Ela-c-myc transgenic mice. *Molecular Cancer* 24:11
