# Supplementary material for: Comparative analysis of SV40 17kT and LT function in vivo demonstrates that LT's C-terminus re-programs hepatic gene expression and is necessary for tumorigenesis in the liver
Source: PubMed Central journal article supplement — Oncogenesis. 2012 Sep 10;1(9):e28–. doi: 10.1038/oncsis.2012.27 (PMC3503294; doi:10.1038/oncsis.2012.27), 2012-09-10
Supplement: oncsis201227x14.pdf [file oncsis201227x14.pdf]

**Supplementary Table S6: Fetal Hepatic Stem Cell-enriched mRNAs and their regulation by 17kT or LT**

| mRNAs enriched in Fetal Hepatic Stem Cells <sup>1</sup> |      |       |
|---------------------------------------------------------|------|-------|
| mRNA                                                    | 17kT | LT    |
| afp                                                     | ↑    | ↑↑↑↑↑ |
| bex1/rex3                                               | ↑    | ↑↑↑↑  |
| cdkn1c                                                  | ↑    | ↑     |
| cdc2a                                                   | ↑    | ↑     |
| cdc24                                                   | ND   | ND    |
| cd24a                                                   | ↓    | ↑↑    |
| dlk1                                                    | —    | —     |
| h19                                                     | ↑    | ↑↑↑↑  |
| gpc3                                                    | ↑    | ↑↑    |
| grb10                                                   | —    | —     |
| igf2                                                    | ↑    | ↑↑    |
| igf2bp3                                                 | ↑    | ↑     |
| myc                                                     | ↑    | ↑↑↑   |
| ncaph                                                   | ↑    | ↑     |
| nope                                                    | —    | —     |
| panx1                                                   | —    | —     |
| prom1/CD133                                             | —    | ↑↑    |
| psat1                                                   | ↑↑↑  | ↑↑↑   |
| ptgfrn                                                  | ↑    | ↑     |
| peg3                                                    | ↓    | ↑↑↑   |
| robo1                                                   | —    | —     |
| sgce                                                    | ↑    | ↑     |
| uhrf1                                                   | ↑↑   | ↑     |

— Unchanged  
 ND Not Determined, not on array  
 ↑ Up-regulated  
 ↓ Down-regulated

<sup>1</sup>Schmid and Schulz. (1990) Coexpression of the c-myc protooncogene with alpha-fetoprotein and albumin in fetal mouse liver. *Differentiation* **45**: 96-102

Nierhoff et al. (2007) New cell surface markers for murine fetal hepatic stem cells identified through high density complementary DNA microarrays. *Hepatology* **46**: 535-547.

Rountree et al. (2007) A CD133-expressing murine liver oval cell population with bilineage potential. *Stem Cells* **25**: 2419-2429.

Oertel et al. (2008) Purification of fetal liver stem/progenitor cells containing all the repopulation potential for normal adult rat liver. *Gastroenterology* **134**: 823-832.
