# Supplementary material for: Comparative analysis of SV40 17kT and LT function in vivo demonstrates that LT's C-terminus re-programs hepatic gene expression and is necessary for tumorigenesis in the liver
Source: PubMed Central journal article supplement — Oncogenesis. 2012 Sep 10;1(9):e28–. doi: 10.1038/oncsis.2012.27 (PMC3503294; doi:10.1038/oncsis.2012.27), 2012-09-10
Supplement: oncsis201227x15.pdf [file oncsis201227x15.pdf]

**Supplementary Table S7: mRNAs preferentially induced by 17kT: potential p53 targets or interactors**

| Gene                             | 17kT vs WT | LT vs WT | 17kT vs LT | p53 Target/Interactor/Pathway            |
|----------------------------------|------------|----------|------------|------------------------------------------|
| 629242 /// BC005512 /// F630007  | 3.90       | 0.04     | 97.50      |                                          |
| Slitrk4                          | 9.35       | 0.21     | 44.52      |                                          |
| Lmln                             | 10.78      | 0.33     | 32.67      |                                          |
| 629242 /// BC005512 /// F630007  | 5.67       | 0.19     | 29.84      |                                          |
| Cox6b2                           | 8.65       | 0.42     | 20.60      |                                          |
| Acot1 /// LOC100044830           | 18.93      | 1.23     | 15.39      |                                          |
| Ces5                             | 3.55       | 0.28     | 12.68      |                                          |
| St14                             | 9.04       | 0.72     | 12.56      | Amundson et al., 2005                    |
| Cyp3a41a                         | 7.18       | 0.60     | 11.97      |                                          |
| Eda2r                            | 20.61      | 2.11     | 9.77       | Brosh et al., 2010                       |
| Acot1 /// Acot2 /// LOC100044830 | 13.31      | 1.42     | 9.37       |                                          |
| Sulf2                            | 4.27       | 0.47     | 9.09       | Chau et al., 2009                        |
| Psrc1                            | 14.97      | 1.69     | 8.86       | Lo et al., 1999                          |
| 6430604M11Rik                    | 5.53       | 0.80     | 6.91       |                                          |
| Psrc1                            | 16.74      | 2.55     | 6.56       | Lo et al., 1999                          |
| Ccng1                            | 4.05       | 0.69     | 5.87       | Min et al., 2009                         |
| Ak1                              | 4.43       | 0.76     | 5.83       | Collavin et al., 1999                    |
| Ptp4a3                           | 9.99       | 1.79     | 5.58       | Basak et al., 2008                       |
| Cidea                            | 9.97       | 1.85     | 5.39       |                                          |
| Sulf2                            | 13.11      | 2.46     | 5.33       | Chau et al., 2009                        |
| Btg2                             | 4.32       | 0.86     | 5.02       | Rouault et al., 1996; Boiko et al., 2006 |
| AI854517                         | 7.58       | 1.53     | 4.95       |                                          |
| Cp                               | 9.10       | 1.86     | 4.89       |                                          |
| Cirbp                            | 6.56       | 1.37     | 4.79       |                                          |
| Cdkn1a                           | 6.75       | 1.42     | 4.75       | El-Deiry et al., 1993                    |
| 1810010H24Rik                    | 9.18       | 1.94     | 4.73       |                                          |
| Angptl4                          | 6.91       | 1.48     | 4.67       |                                          |
| St3gal5                          | 3.92       | 0.84     | 4.67       |                                          |
| Ren1 /// Ren2                    | 31.33      | 6.77     | 4.63       |                                          |
| Ccng1                            | 7.17       | 1.56     | 4.60       | Min et al., 2009                         |
| 1700001L05Rik                    | 5.49       | 1.20     | 4.58       |                                          |
| 5430401F13Rik /// 625758         | 4.30       | 0.94     | 4.57       |                                          |
| Muc13                            | 7.58       | 1.69     | 4.49       |                                          |
| Cpt1c                            | 28.78      | 6.42     | 4.48       | Bungard et al., 2010; Zaugg et al., 2011 |

**Supplementary Table S7: mRNAs preferentially induced by 17kT: potential p53 targets or interactors**

|               |       |       |      |                                                                       |
|---------------|-------|-------|------|-----------------------------------------------------------------------|
| Txnip         | 5.46  | 1.41  | 3.87 |                                                                       |
| Lztr1         | 3.27  | 0.87  | 3.76 |                                                                       |
| 4833417J20Rik | 4.37  | 1.17  | 3.74 |                                                                       |
| Zmat3         | 5.77  | 1.56  | 3.70 | Varmeh-Ziaie et al., 1997; Israeli et al., 1997; Vilborg et al., 2009 |
| Acot2         | 6.83  | 1.87  | 3.65 |                                                                       |
| Iqgap1        | 3.56  | 0.99  | 3.60 |                                                                       |
| Zbtb16        | 25.45 | 7.12  | 3.57 |                                                                       |
| Aen           | 3.11  | 0.89  | 3.49 | Kawase et al., 2008                                                   |
| Trp53inp1     | 3.70  | 1.07  | 3.46 | Okamura et al., 2001                                                  |
| 4632434I11Rik | 4.94  | 1.48  | 3.34 |                                                                       |
| Cdkn1a        | 13.69 | 4.11  | 3.33 | El-Deiry et al., 1993                                                 |
| Klf10         | 3.12  | 0.95  | 3.28 |                                                                       |
| 1110020A10Rik | 25.71 | 8.11  | 3.17 |                                                                       |
| Kcnj11        | 3.28  | 1.04  | 3.15 |                                                                       |
| Pdk4          | 4.53  | 1.44  | 3.15 |                                                                       |
| Usp14         | 3.17  | 1.01  | 3.14 |                                                                       |
| Gtse1         | 64.37 | 20.54 | 3.13 | Utrera et al., 1998; Collavin et al., 2000                            |
| Steap4        | 3.12  | 1.00  | 3.12 |                                                                       |
| Ddit4         | 4.14  | 1.33  | 3.11 | Ellisen et al., 2002                                                  |
| Ddit4l        | 3.56  | 1.15  | 3.10 |                                                                       |
| Brcc3         | 3.85  | 1.28  | 3.01 |                                                                       |
| Pmaip1        | 39.36 | 13.14 | 3.00 | Oda et al., 2000                                                      |
| 2900046B09Rik | 3.01  | 1.02  | 2.95 |                                                                       |
| Cln6          | 3.51  | 1.21  | 2.90 |                                                                       |
| Eif2s1        | 26.60 | 9.19  | 2.89 |                                                                       |
| Pqlc3         | 3.46  | 1.21  | 2.86 |                                                                       |
| G0s2          | 3.49  | 1.23  | 2.84 |                                                                       |
| Nolc1         | 3.48  | 1.23  | 2.83 | Hwang et al., 2009                                                    |
| Ngo1          | 4.15  | 1.47  | 2.82 | Asher et al., 2001                                                    |
| Cpt1a         | 3.01  | 1.07  | 2.81 |                                                                       |
| Acot3         | 16.87 | 6.01  | 2.81 |                                                                       |
| Usp14         | 4.12  | 1.47  | 2.80 |                                                                       |
| LOC100046086  | 8.09  | 2.98  | 2.71 |                                                                       |
| Aen           | 22.34 | 8.26  | 2.70 | Kawase et al., 2008                                                   |
| Serinc3       | 3.11  | 1.15  | 2.70 |                                                                       |
| Gria3         | 19.77 | 7.32  | 2.70 |                                                                       |

**Supplementary Table S7: mRNAs preferentially induced by 17kT: potential p53 targets or interactors**

|                                  |       |       |      |                          |
|----------------------------------|-------|-------|------|--------------------------|
| Mt2                              | 10.67 | 3.97  | 2.69 |                          |
| Calml4                           | 3.62  | 1.35  | 2.68 |                          |
| Nek3                             | 4.67  | 1.76  | 2.65 |                          |
| Mdm2                             | 4.07  | 1.55  | 2.63 | Eischen and Lozano, 2009 |
| Klc3                             | 9.18  | 3.53  | 2.60 |                          |
| Rev1                             | 6.13  | 2.36  | 2.60 |                          |
| Sipa1l2                          | 20.48 | 7.89  | 2.60 |                          |
| Ddit4l                           | 4.30  | 1.66  | 2.59 |                          |
| Gm98                             | 4.74  | 1.83  | 2.59 |                          |
| Nr1d2                            | 6.56  | 2.55  | 2.57 |                          |
| Cpt1a                            | 3.11  | 1.22  | 2.55 |                          |
| Kif4                             | 5.73  | 2.27  | 2.52 |                          |
| Brca1                            | 70.80 | 28.13 | 2.52 |                          |
| Gadd45b                          | 16.52 | 6.72  | 2.46 |                          |
| Alg14                            | 3.49  | 1.42  | 2.46 |                          |
| Ccl6                             | 4.29  | 1.78  | 2.41 |                          |
| Plk2                             | 3.93  | 1.65  | 2.38 | Burns et al., 2003       |
| Bcl10                            | 6.24  | 2.63  | 2.37 |                          |
| Slc22a5                          | 3.08  | 1.31  | 2.35 |                          |
| LOC676549 /// OTTMUSG00000007    | 3.94  | 1.68  | 2.35 |                          |
| Uhrf1                            | 12.02 | 5.13  | 2.34 |                          |
| Steap4                           | 3.10  | 1.33  | 2.33 |                          |
| Acot2                            | 34.60 | 15.00 | 2.31 |                          |
| D2Ert750e                        | 3.72  | 1.62  | 2.30 |                          |
| 1200016E24Rik                    | 15.10 | 6.58  | 2.29 |                          |
| Cnn3 /// LOC100047856            | 3.14  | 1.37  | 2.29 |                          |
| Bmp2                             | 3.55  | 1.56  | 2.28 |                          |
| Pim3                             | 4.84  | 2.15  | 2.25 |                          |
| Uhrf1                            | 19.18 | 8.60  | 2.23 | Arima et al., 2004       |
| Lrch1                            | 4.27  | 1.92  | 2.22 |                          |
| Ear1 /// Ear12 /// Ear2 /// Ear3 | 3.78  | 1.70  | 2.22 |                          |
| Pvr                              | 6.61  | 2.98  | 2.22 |                          |
| Exod1                            | 7.48  | 3.38  | 2.21 |                          |
| D2Ert750e                        | 12.85 | 5.86  | 2.19 |                          |
| Gtf3c2                           | 3.20  | 1.46  | 2.19 |                          |
| Rrm2                             | 14.00 | 6.39  | 2.19 |                          |

**Supplementary Table S7: mRNAs preferentially induced by 17kT: potential p53 targets or interactors**

|                          |        |        |      |                      |
|--------------------------|--------|--------|------|----------------------|
| Aaas                     | 29.05  | 13.30  | 2.18 |                      |
| Dleu2                    | 5.60   | 2.57   | 2.18 |                      |
| Pbk                      | 13.86  | 6.38   | 2.17 | Nandi et al., 2007   |
| Mt1                      | 12.35  | 5.73   | 2.16 |                      |
| Reep3                    | 3.20   | 1.49   | 2.15 |                      |
| Baiap2                   | 3.08   | 1.44   | 2.14 |                      |
| Recql                    | 24.13  | 11.31  | 2.13 |                      |
| Cyb561                   | 25.42  | 11.94  | 2.13 |                      |
| Eme2                     | 5.39   | 2.54   | 2.12 |                      |
| Trip13                   | 5.99   | 2.84   | 2.11 |                      |
| Csrp1                    | 43.37  | 20.58  | 2.11 |                      |
| Per1                     | 99.16  | 47.07  | 2.11 |                      |
| Siva1                    | 4.02   | 1.91   | 2.10 | Fortin et al., 2004  |
| Mastl                    | 5.90   | 2.81   | 2.10 |                      |
| 1500010J02Rik            | 4.15   | 1.98   | 2.10 |                      |
| Kif11                    | 7.46   | 3.57   | 2.09 |                      |
| Miip                     | 6.45   | 3.13   | 2.06 |                      |
| Rrm2                     | 14.44  | 7.01   | 2.06 |                      |
| 1810030007Rik            | 3.81   | 1.85   | 2.06 |                      |
| H2afx                    | 6.71   | 3.27   | 2.05 | Fragkos et al., 2009 |
| Tenc1                    | 3.48   | 1.70   | 2.05 |                      |
| Trio                     | 3.57   | 1.75   | 2.04 |                      |
| Brd8                     | 5.41   | 2.66   | 2.03 |                      |
| Tnfrsf12a                | 205.96 | 101.58 | 2.03 |                      |
| Akirin1                  | 3.00   | 1.49   | 2.01 |                      |
| Acot4                    | 3.04   | 1.51   | 2.01 |                      |
| Rad51c                   | 3.73   | 1.86   | 2.01 |                      |
| Cd300lf /// LOC100047115 | 5.04   | 2.52   | 2.00 |                      |
| Ebna1bp2                 | 6.30   | 3.15   | 2.00 |                      |
| Fam160a2                 | 4.50   | 2.25   | 2.00 |                      |
| H2afz                    | 4.40   | 2.20   | 2.00 |                      |
| Rrm2                     | 14.92  | 7.46   | 2.00 |                      |

For references associated with this table, please see Supplementary Table S7 References at the end of Supplementary Information
